# Supplementary material for: Preparation and characterization of fully renewable polybenzoxazines from monomers containing multi-oxazine rings
Source: Royal Society of Chemistry journal article supplement (doi:10.1039/c5ra17164d), 2015-01-01
Supplement: c5ra17164d1.pdf [file c5ra17164d1.pdf]

Supplementary information

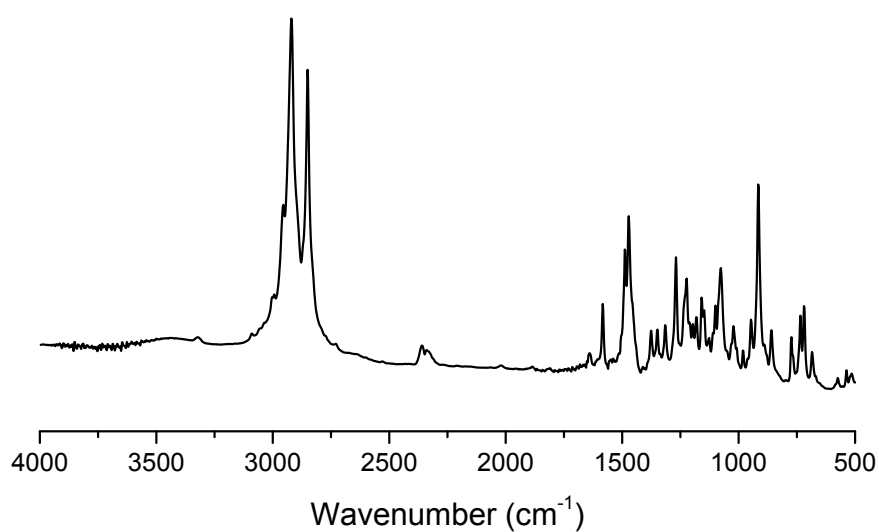

Figure S1 FT-IR spectrum of **Bz\_Go**.

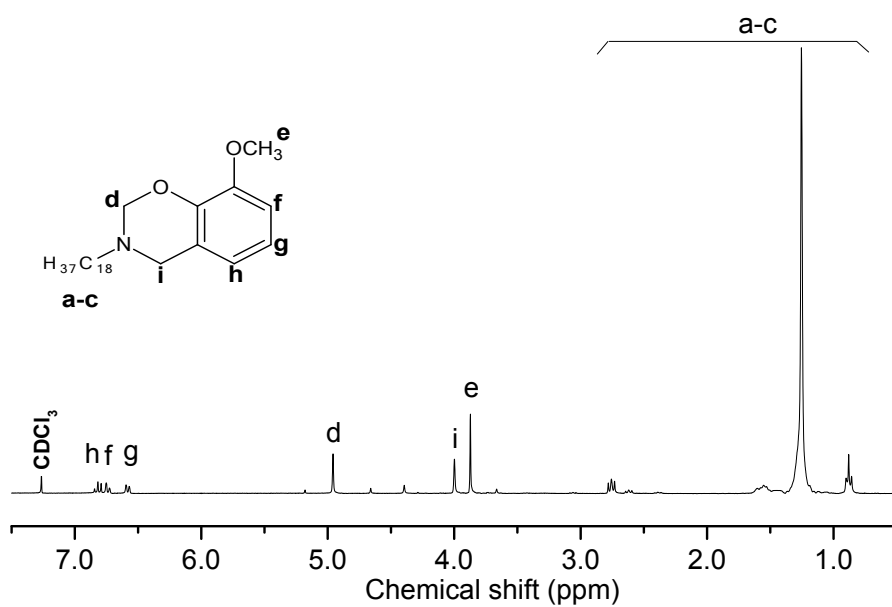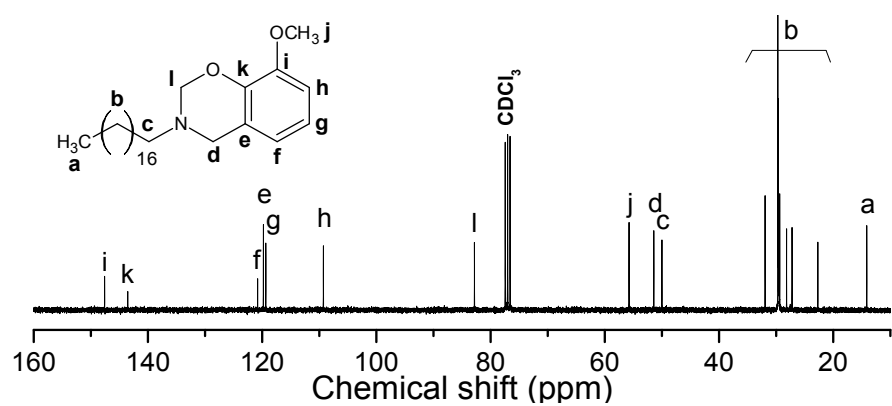

Figure S2 <sup>1</sup>H-NMR and <sup>13</sup>C-NMR spectra of **Bz\_Go**.

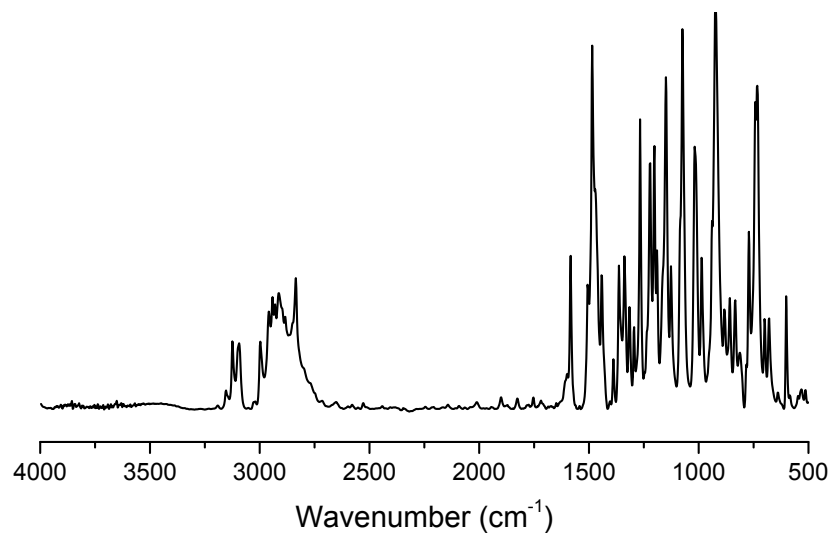

Figure S3 FT-IR spectrum of **Bz\_Gf**.

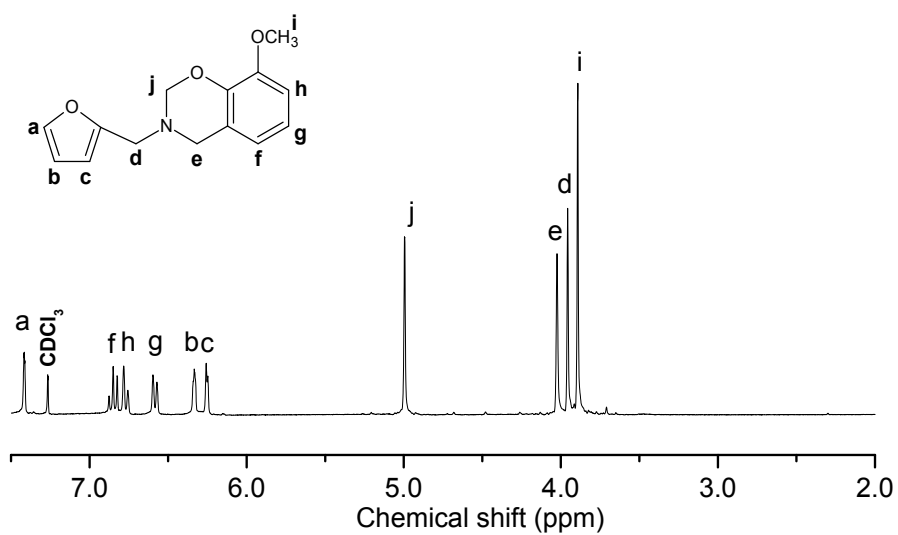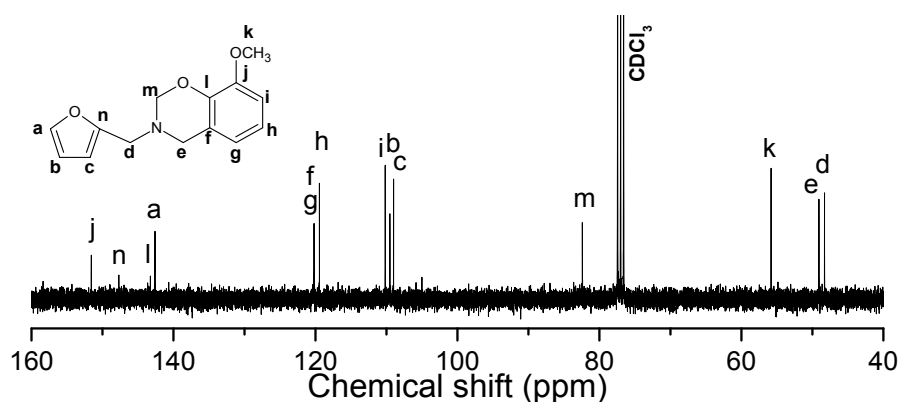

Figure S4  $^1\text{H}$ -NMR and  $^{13}\text{C}$ -NMR spectra of **Bz\_Gf**.

**a1**

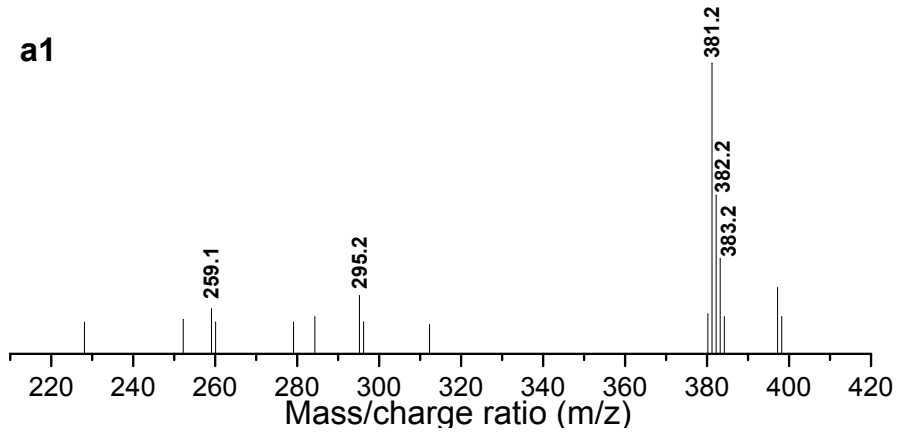

**a2**

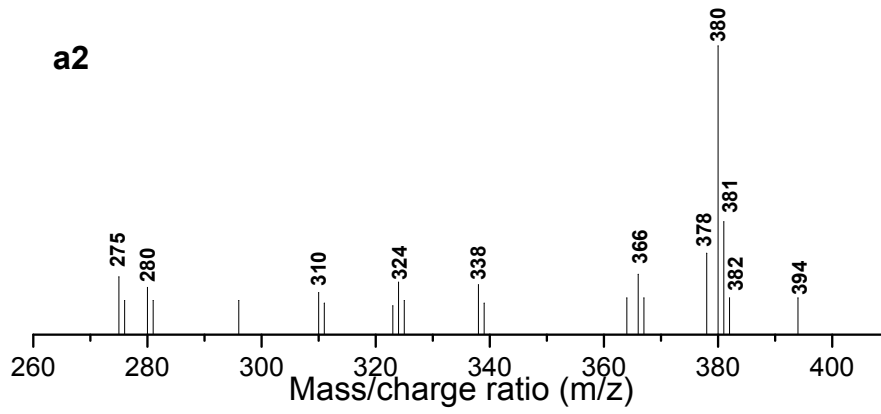

**b**

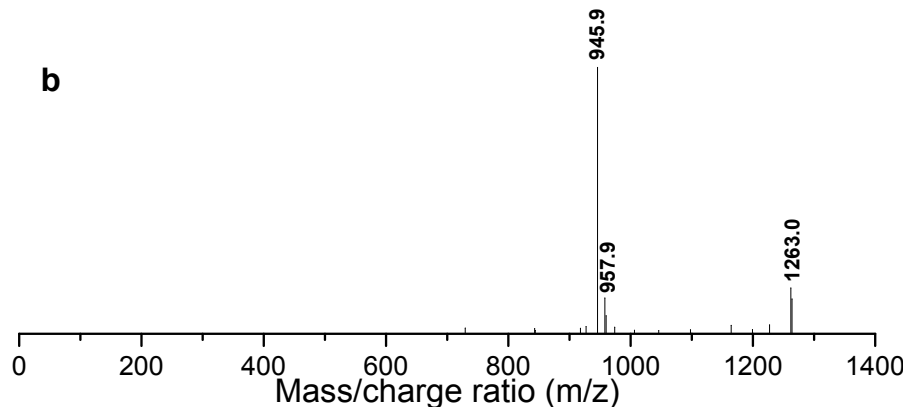

**c**

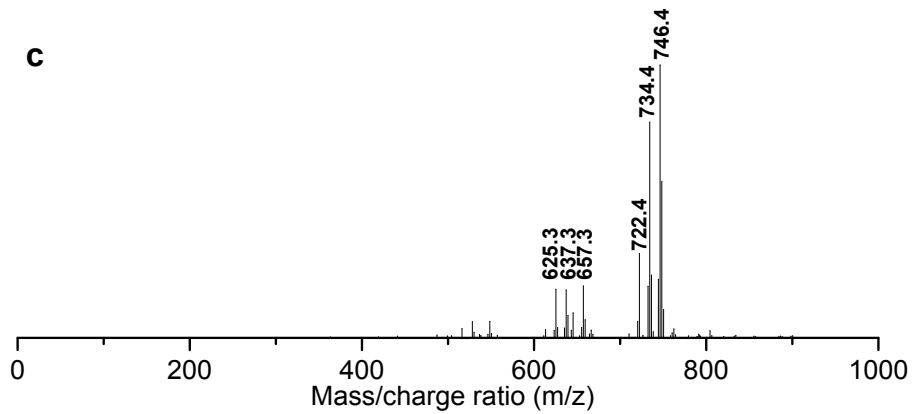

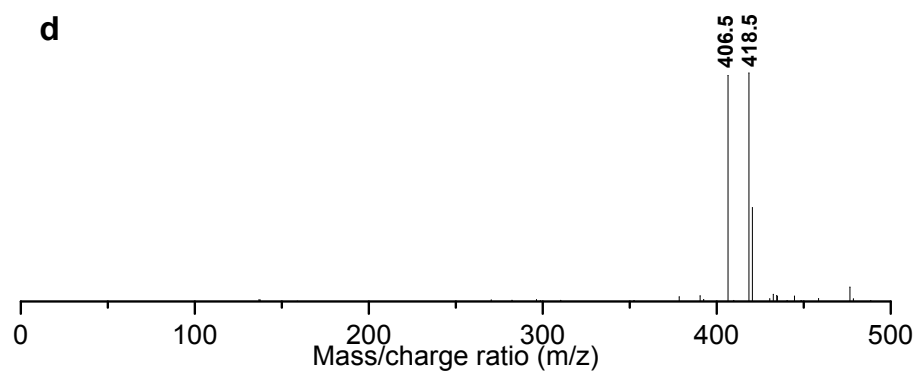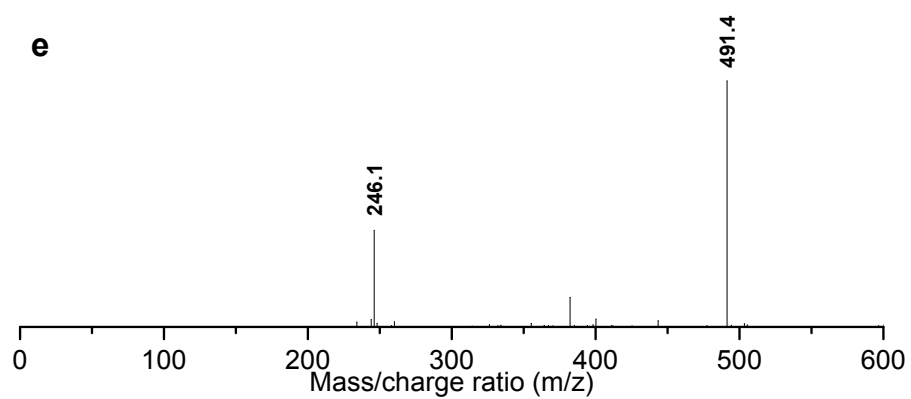

Figure S5 MALDI mass of (a1) **TP** (positive mode), (a2) **TP** (negative mode), (b) **Bz\_TPo** (positive mode), (c) **Bz\_TPf** (positive mode), (d) **Bz\_Go** (positive mode) and (e) **Bz\_Gf** (positive mode).
